# Supplementary material
Source: publisher site journal article supplement (https://www.spandidos-publications.com/4772/downloadSupplementary)

Figure S1. Histograms showing distribution of TAP staining QuickScores. TAP1 in (A) benign and (B) SCCOT lesions. TAP2 in (C) benign and (D) SCCOT lesions. SCCOT, squamous cell carcinoma of the oral tongue; TAP, transporter associated with antigen processing.

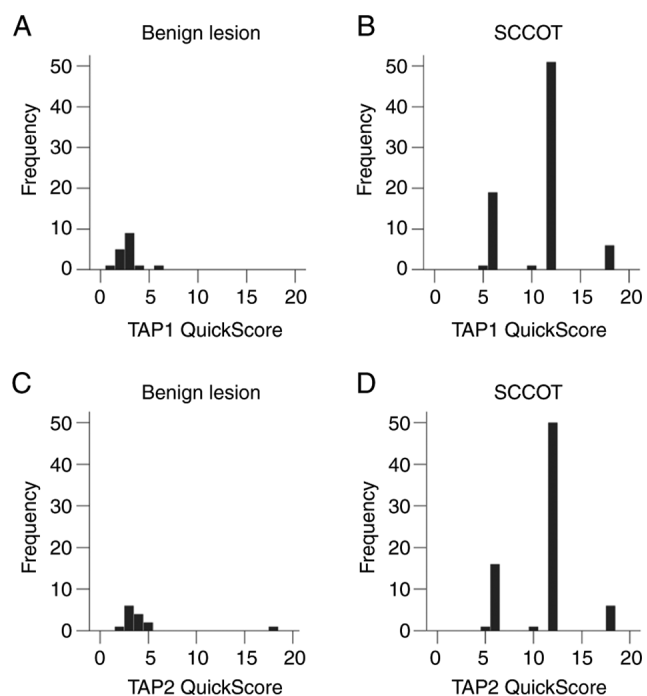

Supplement: Supplementary file 1 [file downloadSupplementary]
